# Supplementary material
Source: PubMed Central journal article supplement (PMC4279952)
Supplement: NIHMS637450-supplement-1.pdf [file NIHMS637450-supplement-1.pdf]

# Supplementary Data 1

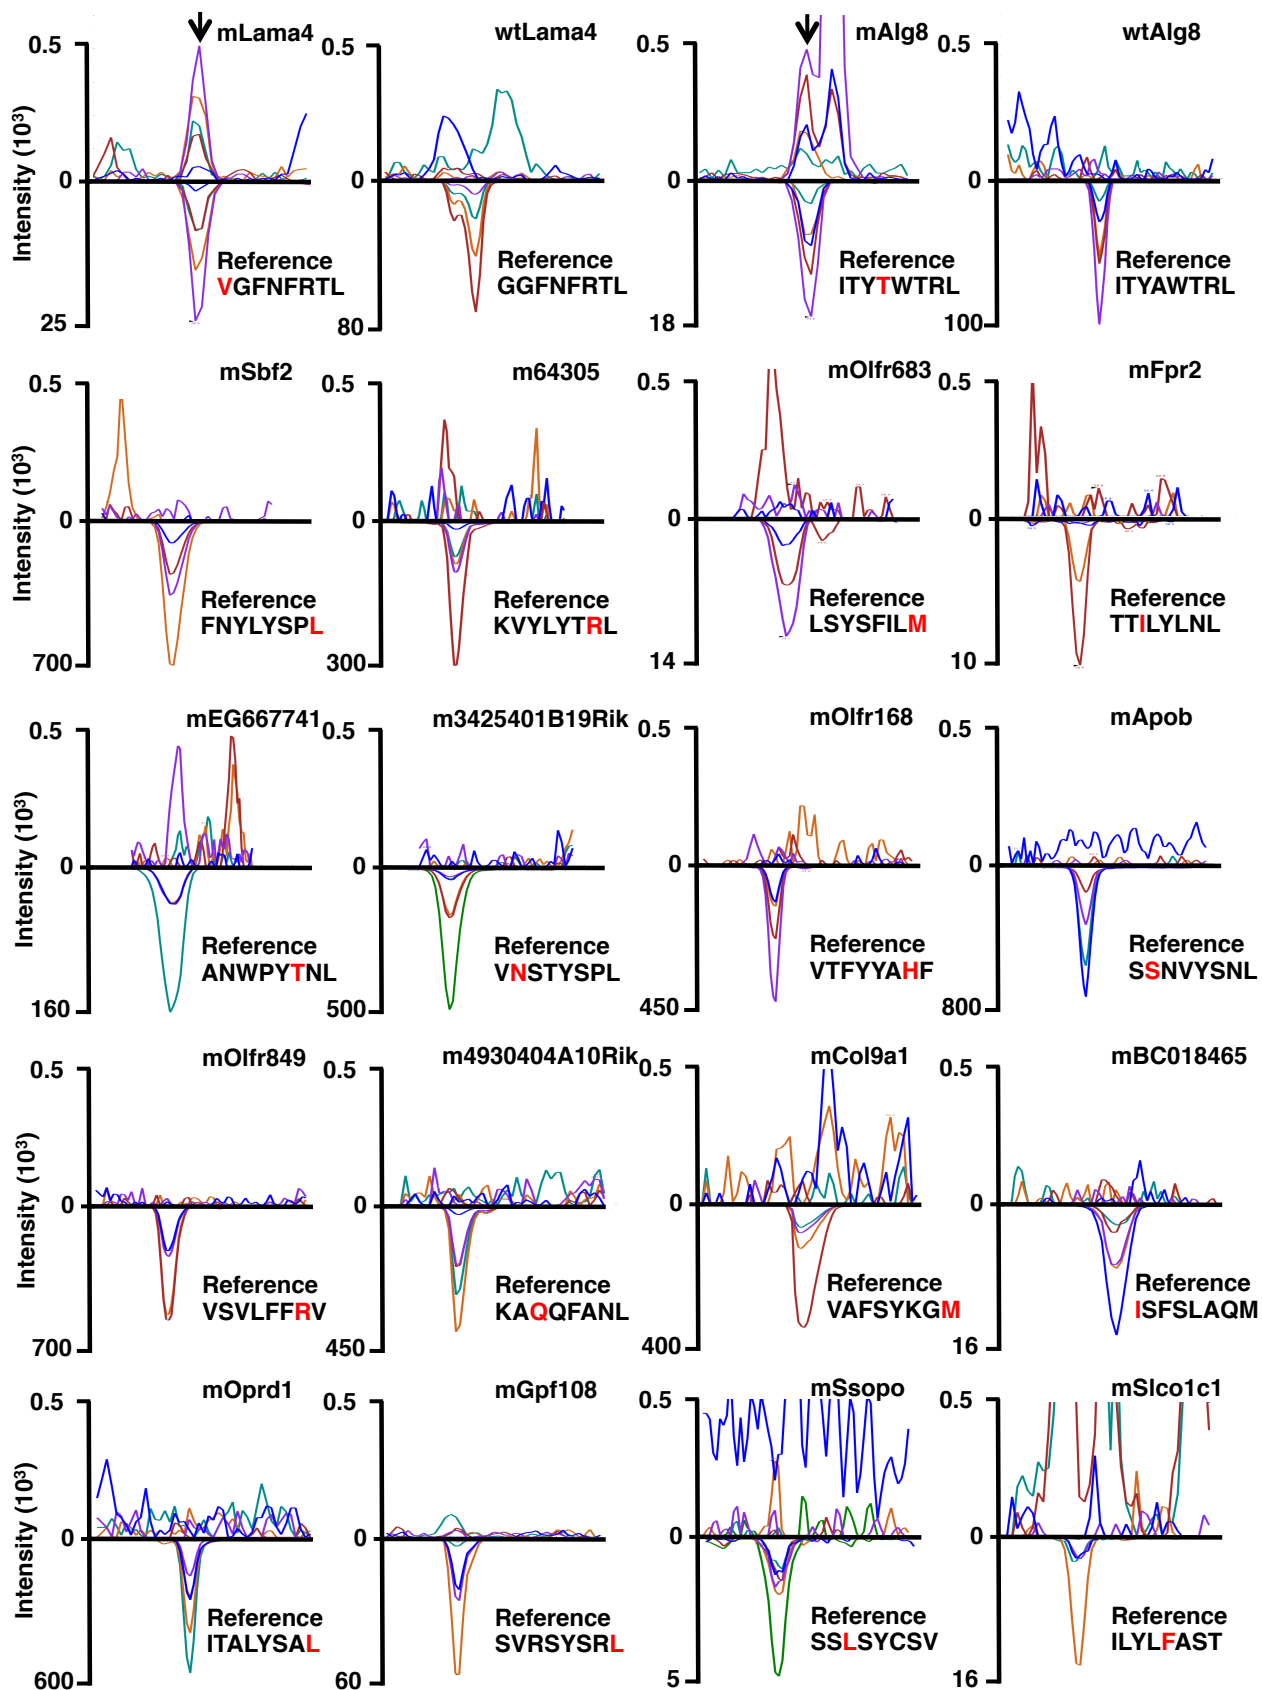

# Supplementary Data 1 (cont.)

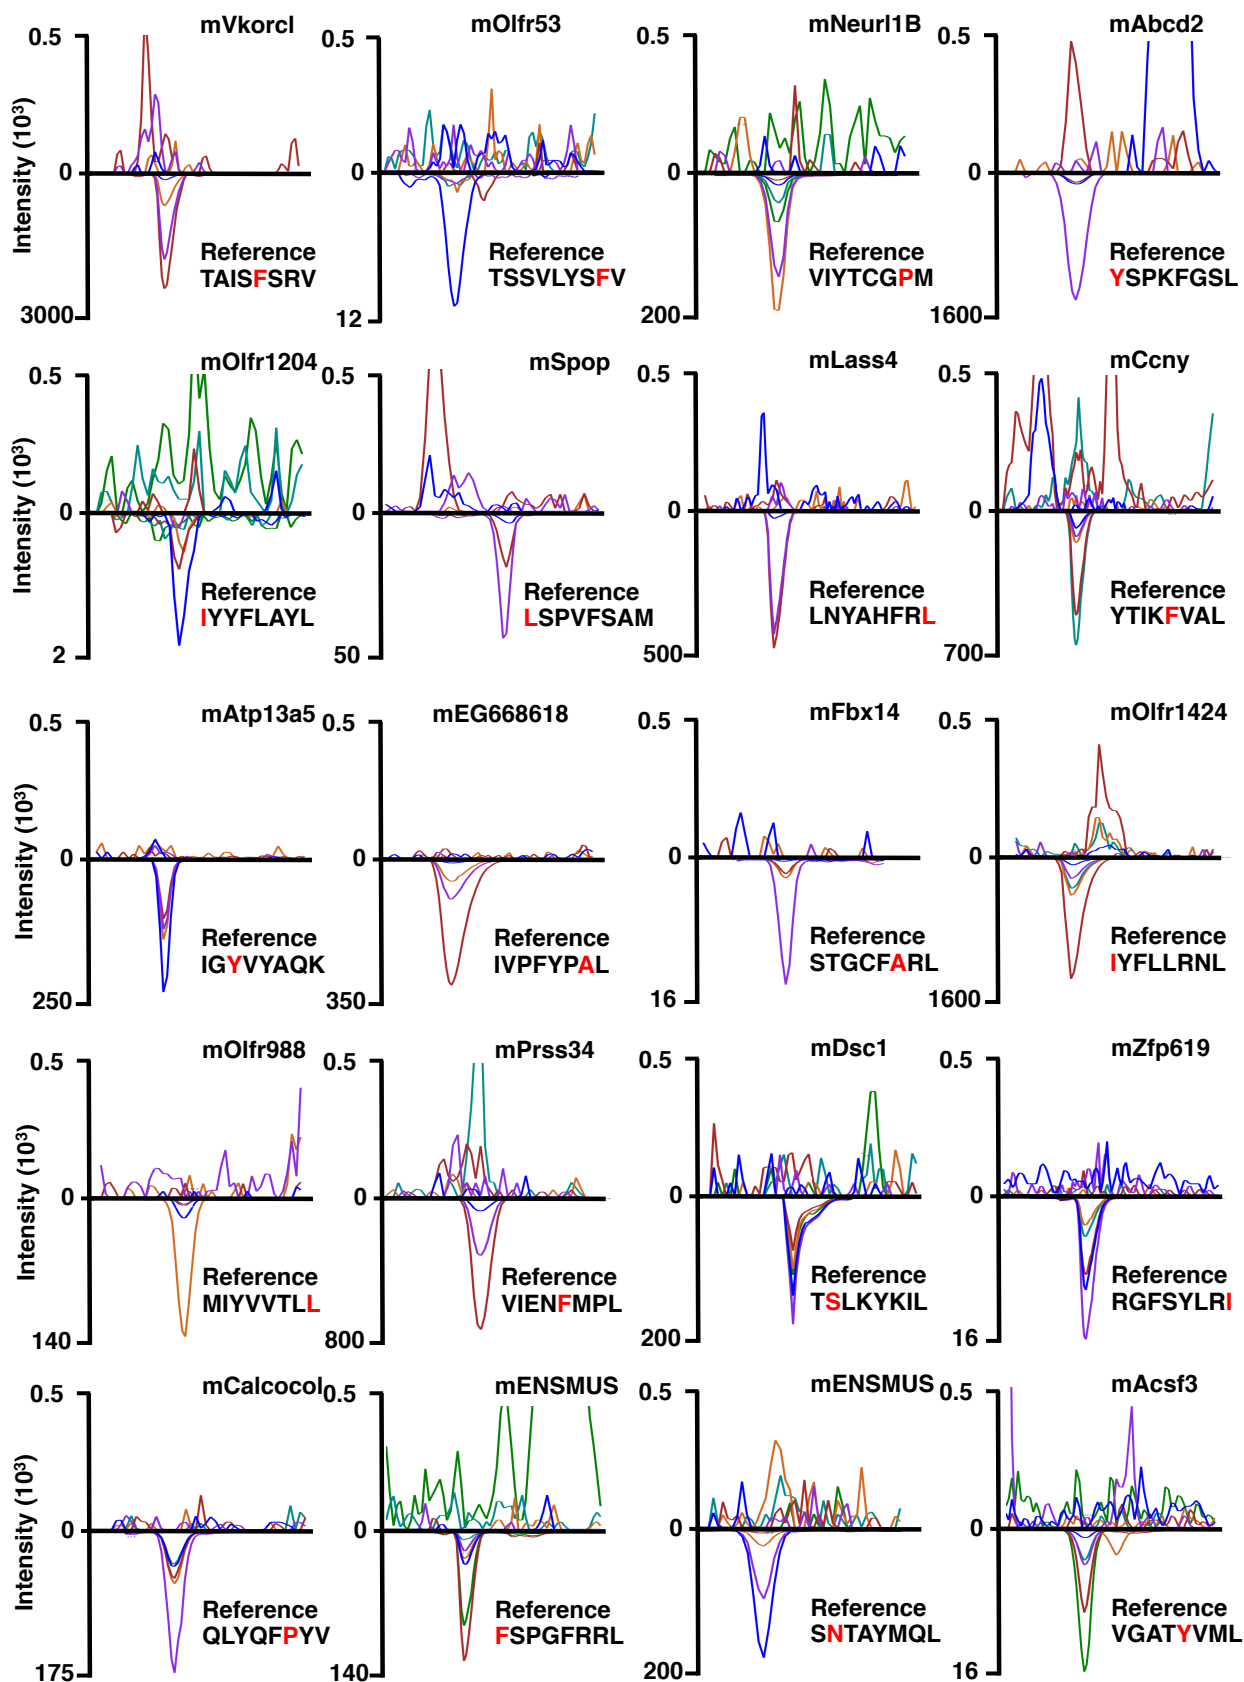

## Supplementary Data 1 (cont.)

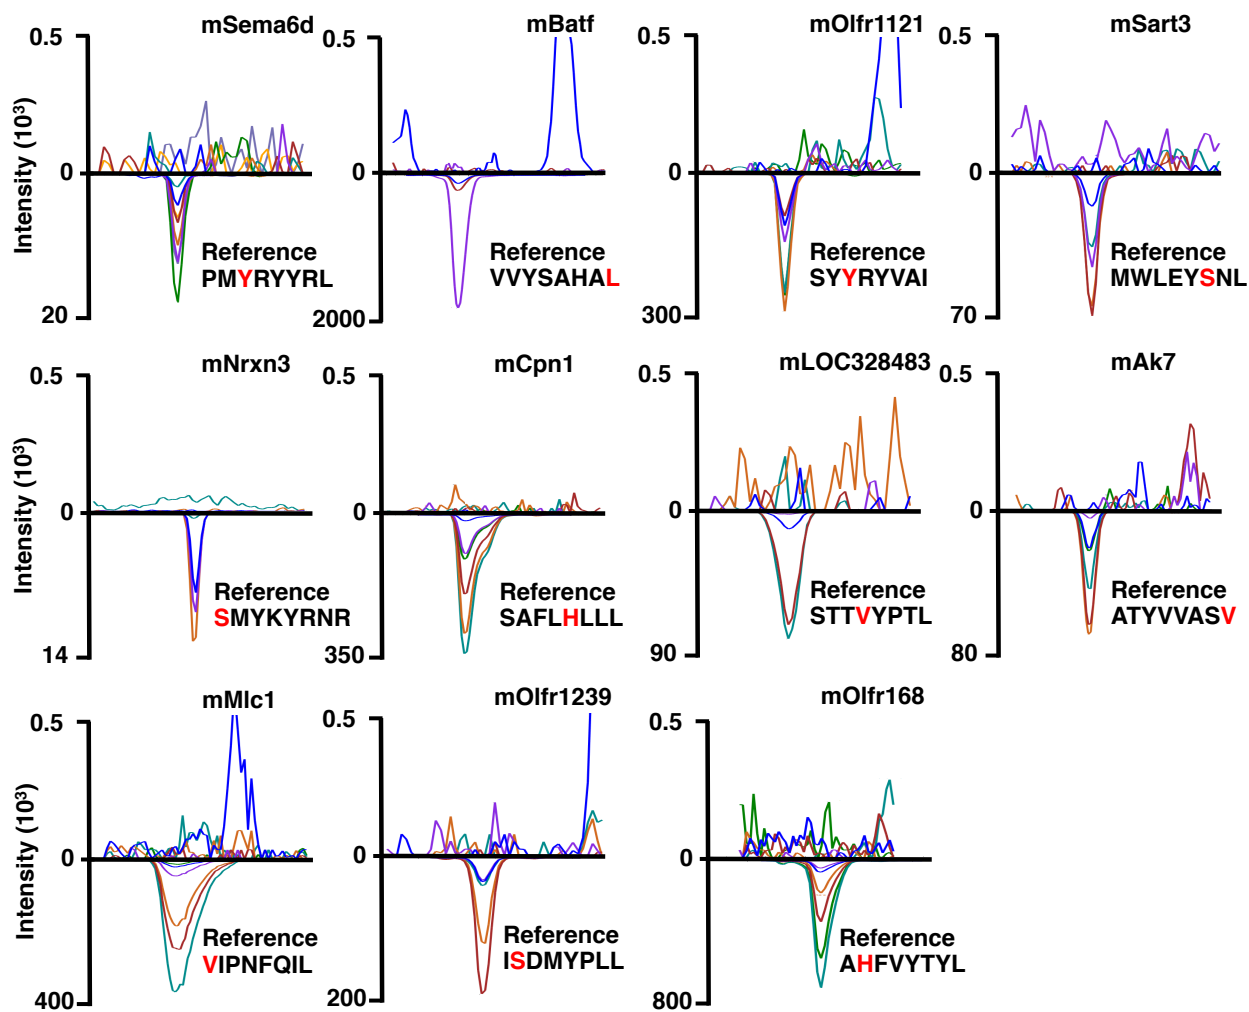

**Supplementary Data 1. Mutant forms of Lama4 and Alg8 are the only detectable mutant peptides bound to H-2K<sup>b</sup>.** 51 of the 62 top predicted H-2K<sup>b</sup> epitopes were tested for their ability to be detected by SRM in complex with H-2K<sup>b</sup> on the surface of d42m1-T3 tumour cells. The detected transition groups corresponding to the naturally processed and presented mLama4 and mAlg8 are indicated by the black arrows.
